# Supplementary material
Source: Springer Nature journal article supplement (https://www.springermedizin.de/resource/supplementary/12894_2010_160_MOESM2_ESM.pdf/9513098)

□ No Adjustment

▣ Adjustment at intermediate visit

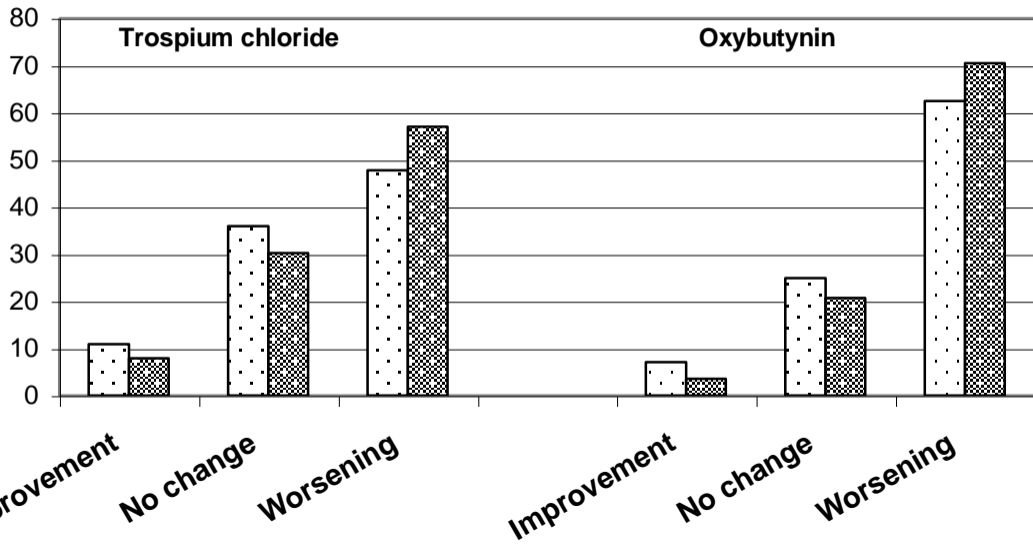

Supplement: MOESM2 [file 9513098]
